# Supplementary material for: A novel rosamine-based fluorescent probe for bisulfite in aqueous solution
Source: Royal Society of Chemistry journal article supplement (doi:10.1039/c6ra24667b), 2016-01-01
Supplement: c6ra24667b1.pdf [file c6ra24667b1.pdf]

# Supporting information

## **A novel rosamine-based fluorescent probe for bisulfite in aqueous solution**

Di Zhang <sup>a\*</sup>, Liu Wenya<sup>b</sup>, Keke Chen <sup>b</sup>, Junye Cheng<sup>b</sup>, Yufen Zhao,<sup>b,c</sup> Yong Ye <sup>b,c,\*</sup>

<sup>a</sup> *Institute of Agricultural Quality Standards and Testing Technology, Henan Academy of Agricultural Sciences, Zhengzhou, China.*

<sup>b</sup> *Phosphorus Chemical Engineering Research Center of Henan Province, The College of Chemistry and Molecular Engineering, Zhengzhou University, Zhengzhou, China.*

<sup>c</sup> *Key Laboratory of Bioorganic Phosphorus Chemistry & Chemical Biology (Ministry of Education), Department of Chemistry, Tsinghua University, Beijing, China*

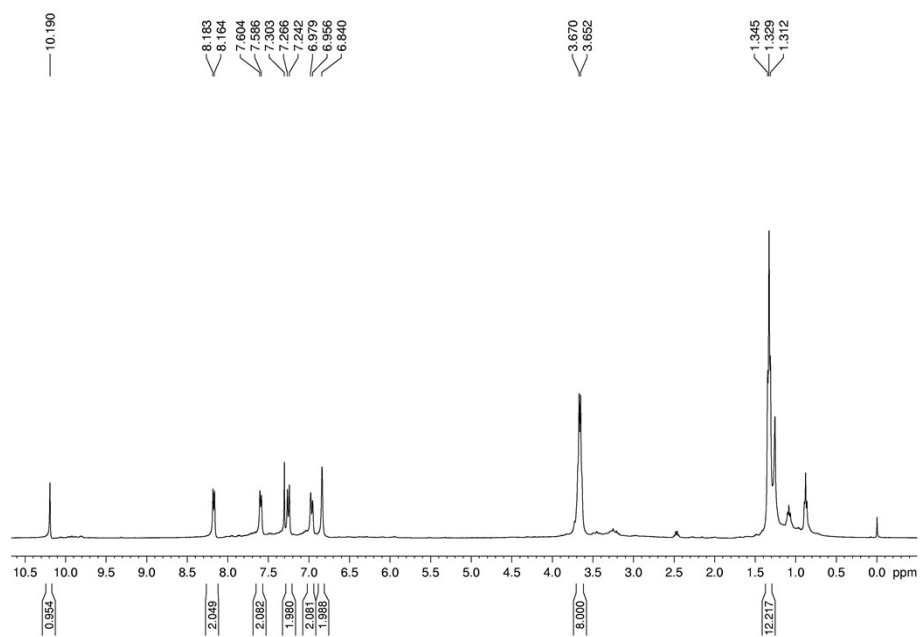

**Figure S1.**  $^1\text{H}$  NMR chart of **RosCHO** ( $\text{CDCl}_3$ , 400 MHz).

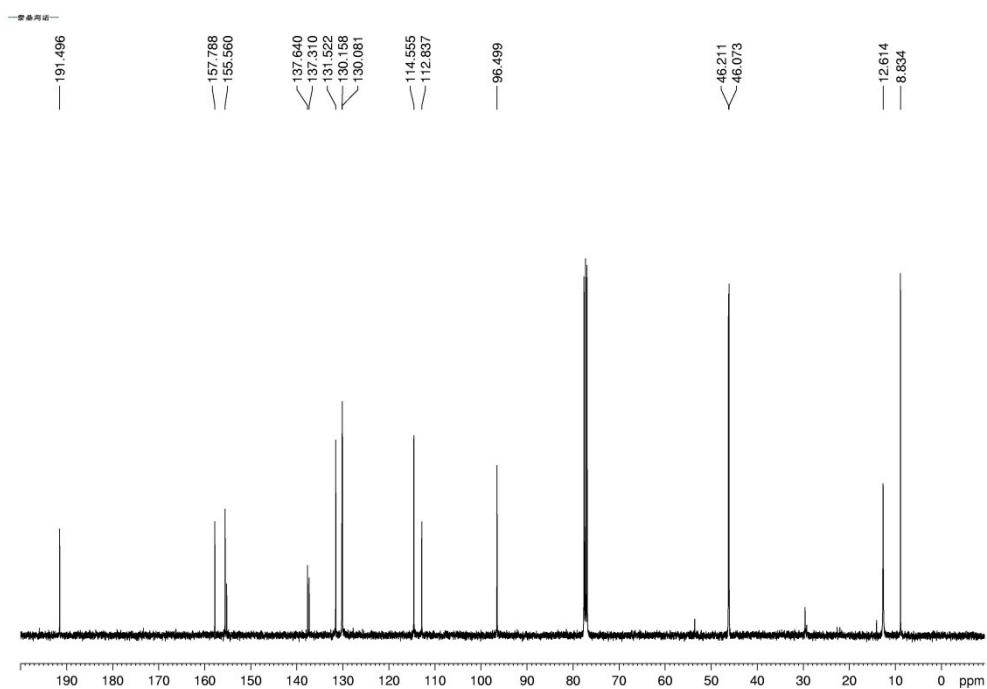

**Figure S2.**  $^{13}\text{C}$  NMR chart of **RosCHO** ( $\text{CDCl}_3$ , 100 MHz).

|               |                  |             |        |                 |              |                        |                      |
|---------------|------------------|-------------|--------|-----------------|--------------|------------------------|----------------------|
| Sample Name   | 427.2380         | Position    | P1-D5  | Instrument Name | Instrument 1 | User Name              | Agilent FSE          |
| Inj Vol       | 0.5              | InjPosition |        | SampleType      | Sample       | IRM Calibration Status | Success              |
| Data Filename | 427.2380-0.2ul.d | ACQ Method  | test.m | Comment         |              | Acquired Time          | 6/12/15 Fri 17:33:58 |

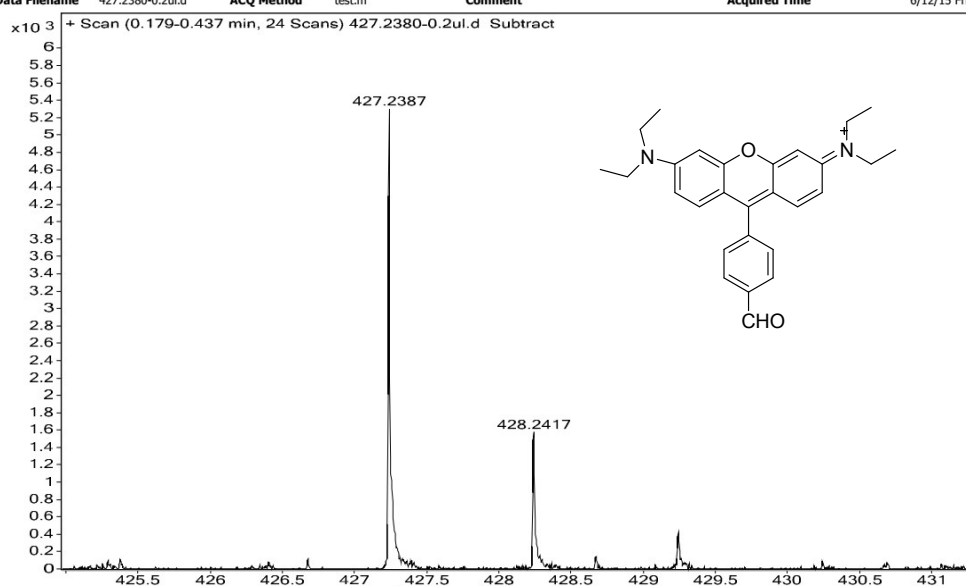

**Figure S3.** ESI-HRMS spectrum of **RosCHO**

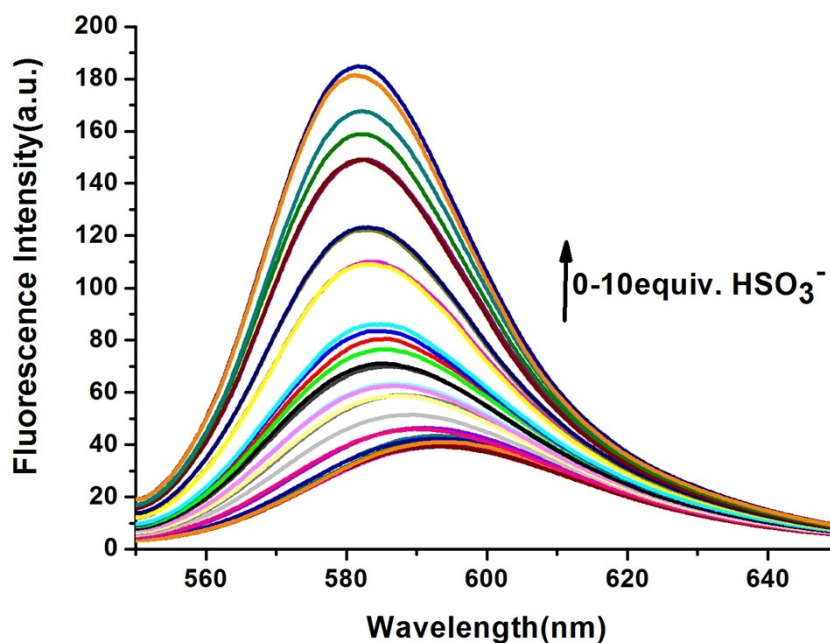

**Figure S4.** Fluorescence emission changes of **RosCHO** (10  $\mu\text{M}$ ) in the presence of different concentrations of  $\text{NaHSO}_3$  (0-100  $\mu\text{M}$ ) in Tris-HCl (10 mM, pH = 5) at room temperature. ( $\lambda_{\text{ex}}$  = 520 nm,  $\lambda_{\text{em}}$  = 580 nm, Slits: 5.0 nm).

| Sample Name   | RosCHO+         | Position    | P1-A8  | Instrument Name | Instrument 1 | User Name              | Agilent FSE           |
|---------------|-----------------|-------------|--------|-----------------|--------------|------------------------|-----------------------|
| Inj Vol       | 0.8             | InjPosition |        | SampleType      | Sample       | IRM Calibration Status | Some Ions Missed      |
| Data Filename | RosCHO+-0.2ul.d | ACQ Method  | test.m | Comment         |              | Acquired Time          | 12/22/15 Tue 15:57:36 |

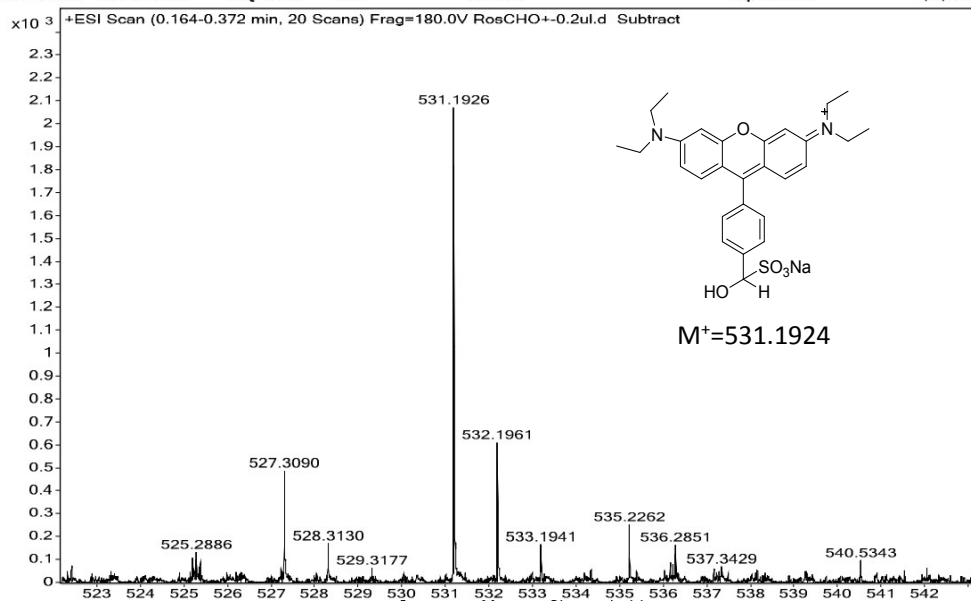

Figure S5. ESI-HRMS spectrum of RosCHO and NaHSO<sub>3</sub>
